# Supplementary material for: Genome-Scale Identification of Essential Metabolic Processes for Targeting the Plasmodium Liver Stage
Source: PubMed Central journal article supplement (PMC6904910; doi:10.1016/j.cell.2019.10.030), 2019-11-14
Supplement: mmc1.pdf [file mmc1.pdf]

## Supplemental Information

### Genome-Scale Identification of Essential

### Metabolic Processes for Targeting

### the *Plasmodium* Liver Stage

Rebecca R. Stanway, Ellen Bushell, Anush Chiappino-Pepe, Magali Roques, Theo Sanderson, Blandine Franke-Fayard, Reto Caldelari, Murielle Golomingi, Mary Nyonda, Vikash Pandey, Frank Schwach, Séverine Chevalley, Jai Ramesar, Tom Metcalf, Colin Herd, Paul-Christian Burda, Julian C. Rayner, Dominique Soldati-Favre, Chris J. Janse, Vassily Hatzimanikatis, Oliver Billker, and Volker T. Heussler

**Table S1: Relative abundance (mean) and standard for genes included in the pilot screen pilot screen**, related to Figure 1. Displayed are the mean values (and standard deviations, SD) for relative of abundance of genes in the pilot screen. Those genes with a published liver stage phenotype are shown with an asterisk beside the Gene ID.

| Gene ID        | Gene name | B1                 |       | MG                 |       | SG                 |       | B2                 |       | Reference related to liver stage phenotype |
|----------------|-----------|--------------------|-------|--------------------|-------|--------------------|-------|--------------------|-------|--------------------------------------------|
|                |           | Relative abundance | SD    | Relative abundance | SD    | Relative abundance | SD    | Relative abundance | SD    |                                            |
| PBANKA_0514900 | P28       | 1.000              | 0.201 | 0.900              | 0.266 | 0.926              | 0.193 | 2.197              | 0.565 | -                                          |
| PBANKA_0515000 | P25       | 1.000              | 0.020 | 1.471              | 0.409 | 1.421              | 0.219 | 2.954              | 0.597 | -                                          |
| PBANKA_1034400 | PM4       | 1.000              | 0.031 | 0.464              | 0.413 | 0.394              | 0.217 | 0.343              | 0.075 | -                                          |
| PBANKA_1037800 | SOAP      | 1.000              | 0.385 | 1.232              | 0.128 | 1.332              | 0.293 | 2.725              | 0.654 | -                                          |
| PBANKA_1104200 | BCKDHB    | 1.000              | 0.195 | 0.325              | 0.076 | 0.242              | 0.339 | 0.180              | 0.204 | -                                          |
| PBANKA_1401600 | -         | 1.000              | 0.332 | 0.191              | 0.199 | 0.140              | 0.243 | 0.471              | 0.751 | -                                          |
| PBANKA_0315000 | -         | 1.000              | 0.410 | 1.477              | 0.429 | 1.229              | 0.174 | 2.469              | 0.758 | -                                          |
| PBANKA_0401200 | ABCB4     | 1.000              | 0.533 | 1.304              | 0.653 | 1.789              | 0.749 | 2.398              | 0.948 | -                                          |
| PBANKA_0519800 | -         | 1.000              | 0.147 | 0.003              | 0.003 | 0.001              | 0.001 | 0.024              | 0.022 | -                                          |
| PBANKA_0833100 | M18AAP    | 1.000              | 0.384 | 1.388              | 0.226 | 1.275              | 0.284 | 2.358              | 0.091 | -                                          |
| PBANKA_0933700 | MAPK2     | 1.000              | 0.155 | 0.564              | 0.145 | 0.910              | 0.166 | 1.628              | 0.558 | -                                          |
| PBANKA_1038300 | TRAM      | 1.000              | 0.197 | 0.965              | 0.226 | 0.772              | 0.123 | 1.038              | 0.100 | -                                          |
| PBANKA_1133400 | EF-1alpha | 1.000              | 0.417 | 1.117              | 0.092 | 1.072              | 0.135 | 2.667              | 1.717 | -                                          |
| PBANKA_1217700 | DOZI      | 1.000              | 0.463 | 0.082              | 0.042 | 0.036              | 0.013 | 0.017              | 0.022 | -                                          |
| PBANKA_1357500 | LipA      | 1.000              | 0.267 | 1.411              | 0.437 | 1.492              | 0.525 | 0.086              | 0.024 | -                                          |
| PBANKA_0615900 | CRMP2     | 1.000              | 1.234 | 1.686              | 2.098 | 1.189              | 1.845 | 2.991              | 4.898 | -                                          |
| PBANKA_0702700 | ROM3      | 1.000              | 0.146 | 2.491              | 0.509 | 0.669              | 0.086 | 1.401              | 0.262 | -                                          |
| PBANKA_0933500 | ROM1      | 1.000              | 0.127 | 0.913              | 0.178 | 1.278              | 0.371 | 1.898              | 0.917 | -                                          |

|                 |         |       |       |       |       |       |       |       |       |                                 |
|-----------------|---------|-------|-------|-------|-------|-------|-------|-------|-------|---------------------------------|
| PBANKA_1411100  | BCKDHA1 | 1.000 | 0.216 | 0.233 | 0.135 | 0.167 | 0.086 | 0.167 | 0.126 | -                               |
| PBANKA_0101100* | PALM    | 1.000 | 0.282 | 1.259 | 0.157 | 1.289 | 0.023 | 0.081 | 0.029 | (Haussig, <i>et al.</i> , 2011) |
| PBANKA_0501200* | UIS4    | 1.000 | 0.193 | 1.385 | 0.201 | 1.395 | 0.253 | 0.069 | 0.031 | (Mueller <i>et al.</i> , 2005)  |
| PBANKA_0506500* | ZIPCO   | 1.000 | 0.143 | 0.716 | 0.212 | 0.584 | 0.150 | 0.282 | 0.040 | (Sahu <i>et al.</i> , 2014)     |
| PBANKA_0714900* | aLipDH  | 1.000 | 0.410 | 1.708 | 0.206 | 1.526 | 0.304 | 0.075 | 0.027 | (Pei <i>et al.</i> , 2010)      |
| PBANKA_0808100* | B9      | 1.000 | 0.103 | 1.612 | 0.612 | 1.581 | 0.288 | 0.086 | 0.043 | (Annoura <i>et al.</i> , 2014)  |
| PBANKA_0902100* | SLARP   | 1.000 | 0.607 | 1.464 | 0.738 | 1.498 | 0.614 | 0.126 | 0.052 | (Silvie, <i>et al.</i> , 2008)  |
| PBANKA_1002100* | P36     | 1.000 | 0.234 | 1.286 | 0.322 | 1.526 | 0.184 | 0.074 | 0.034 | (Ishino, <i>et al.</i> , 2005)  |
| PBANKA_1002200* | P36p    | 1.000 | 0.234 | 1.076 | 0.378 | 1.552 | 0.392 | 0.060 | 0.024 | (Ishino, <i>et al.</i> , 2005)  |
| PBANKA_1006300* | PLP1    | 1.000 | 0.790 | 1.599 | 1.414 | 1.193 | 1.097 | 0.122 | 0.025 | (Ishino, <i>et al.</i> , 2005a) |
| PBANKA_1024600* | LISP1   | 1.000 | 0.186 | 1.466 | 0.351 | 1.283 | 0.153 | 0.159 | 0.100 | (Ishino <i>et al.</i> , 2009)   |
| PBANKA_1125100* | FabB/F  | 1.000 | 0.304 | 1.565 | 0.338 | 1.419 | 0.239 | 0.074 | 0.031 | (Vaughan <i>et al.</i> , 2009)  |
| PBANKA_1128100* | PL      | 1.000 | 0.363 | 1.221 | 0.299 | 1.346 | 0.476 | 0.636 | 0.559 | (Burda <i>et al.</i> , 2015)    |
| PBANKA_1302800* | TPx1    | 1.000 | 0.241 | 1.400 | 0.115 | 1.299 | 0.125 | 2.169 | 0.494 | (Yano <i>et al.</i> , 2008)     |
| PBANKA_1338200* | FabZ    | 1.000 | 0.059 | 1.515 | 0.303 | 1.425 | 0.289 | 0.079 | 0.035 | (Vaughan <i>et al.</i> , 2009)  |
| PBANKA_1349800* | TRAP    | 1.000 | 0.409 | 1.142 | 0.276 | 0.372 | 0.056 | 0.063 | 0.036 | (Sultan <i>et al.</i> , 1997)   |
