# Supplementary material for: Genome-Scale Identification of Essential Metabolic Processes for Targeting the Plasmodium Liver Stage
Source: PubMed Central journal article supplement (PMC6904910; doi:10.1016/j.cell.2019.10.030), 2019-11-14
Supplement: mmc5.pdf [file mmc5.pdf]

**Table S5: Blood and liver stage screening information relating to genes involved in the FASII, FAE, and amino sugar pathways, related to Figures 5, 6 and 7.**

| Participating genes | Enzyme name                                                                    | Abbreviated name (pathway) | Screen phenotype statement                                                                       |                                                                                                            | Liver stage screen information |                    |                          |                                                     |
|---------------------|--------------------------------------------------------------------------------|----------------------------|--------------------------------------------------------------------------------------------------|------------------------------------------------------------------------------------------------------------|--------------------------------|--------------------|--------------------------|-----------------------------------------------------|
|                     |                                                                                |                            | Blood phenotype                                                                                  | Liver phenotype                                                                                            | Log2-fold change               | Standard deviation | Statistical significance | Single knockout validation                          |
| PBANKA_0308200      | apicoplast beta-ketoacyl-acyl carrier protein synthase III precursor, putative | FabH (FASII)               |  Slow           |  > 100-fold reduction   | -9.61                          | 1.02               | reduced                  | Figures 5 and S4                                    |
| PBANKA_0923800      | pyruvate dehydrogenase E1 component subunit alpha                              | PDH E1 alpha (FASII)       |  Essential      | no info                                                                                                    |                                |                    |                          | (Deschermeier et al., 2012)                         |
| PBANKA_1310100      | pyruvate dehydrogenase E1 component subunit beta                               | PDH E1 beta (FASII)        | no info                                                                                          | no info                                                                                                    |                                |                    |                          |                                                     |
| PBANKA_0505000      | dihydroliipoamide acyltransferase, putative                                    | PDH E2 (FASII)             |  Dispensable    |  > 100-fold reduction   | -8.95                          | 0.97               | reduced                  | Figures 5 and S4                                    |
| PBANKA_0520000      | pyruvate kinase 2, putative                                                    | PK (FASII)                 |  Essential      | no info                                                                                                    |                                |                    |                          |                                                     |
| PBANKA_0707000      | lipoate-protein ligase B                                                       | LipB (FASII)               |  Dispensable    |  > 100-fold reduction   | -10.86                         | 0.68               | reduced                  | (Falkard et al., 2013)                              |
| PBANKA_0823800      | 3-oxoacyl-[acyl-carrier-protein] reductase, putative                           | FabG (FASII)               |  Dispensable    |  > 100-fold reduction   | -9.23                          | 0.99               | reduced                  | Figures 5 and S4                                    |
| PBANKA_1125100      | 3-oxoacyl-acyl-carrier protein synthase, putative                              | FabB/F (FASII)             |  Dispensable    |  2-100-fold reduction   | -5.51                          | 0.41               | reduced                  | (Vaughan et al., 2009), <i>P. yoelii</i>            |
| PBANKA_1229800      | enoyl-acyl carrier reductase                                                   | FabI (FASII)               | no info                                                                                          | no info                                                                                                    |                                |                    |                          | (Yu et al., 2008)                                   |
| PBANKA_1332800      | biotin carboxylase subunit of acetyl CoA carboxylase, putative                 | ACC (FASII)                |  Essential      | no info                                                                                                    |                                |                    |                          |                                                     |
| PBANKA_1338200      | beta-hydroxyacyl-ACP dehydratase, putative                                     | FabZ (FASII)               |  Dispensable    |  2-100-fold reduction   | -4.68                          | 0.23               | reduced                  | (Vaughan et al., 2009), <i>P. yoelii</i>            |
| PBANKA_1357500      | lipoyl synthase                                                                | LipA (FASII)               |  Dispensable    |  2-100-fold reduction   | -5.09                          | 0.35               | reduced                  | Figures 5 and S4                                    |
| PBANKA_1410500      | malonyl CoA-acyl carrier protein transacylase precursor, putative              | FabD (FASII)               |  Dispensable  |  > 100-fold reduction | -11.18                         | 0.57               | reduced                  | Figures 5 and S4                                    |
| PBANKA_0511000      | biotin--acetyl-CoA-carboxylase, putative                                       | HLCS (FASII)               |  Dispensable  |  > 100-fold reduction | -8.17                          | 0.63               | reduced                  | (Dellibovi-Ragheb et al., 2018) and Fig. 5, Fig. S4 |
| PBANKA_0104700      | long chain polyunsaturated fatty acid elongation enzyme, putative              | ELO-B (FAE)                |  Dispensable  |  not reduced          | -0.57                          | 1.02               | no power                 |                                                     |
| PBANKA_0204300      | fatty acid elongation protein, GNS1/SUR4 family, putative                      | ELO-C (FAE)                | no info                                                                                          | no info                                                                                                    |                                |                    |                          |                                                     |
| PBANKA_0522400      | steroid dehydrogenase, putative                                                | KCR (FAE)                  |  Dispensable* |  > 100-fold reduction | -9.70                          | 0.81               | reduced*                 | Figures 6 and S5                                    |
| PBANKA_0820900      | long chain fatty acid elongation enzyme, putative                              | ELO-A (FAE)                |  Dispensable  |  > 100-fold reduction | -10.45                         | 0.72               | reduced                  | Figures 6 and S5                                    |

|                |                                                                          |                    |             |                      |        |      |             |                                                 |
|----------------|--------------------------------------------------------------------------|--------------------|-------------|----------------------|--------|------|-------------|-------------------------------------------------|
| PBANKA_0912700 | 3-oxo-5-alpha-steroid dehydrogenase, putative <sup>4-</sup>              | ECR (FAE)          | Essential   | no info              |        |      |             |                                                 |
| PBANKA_1110700 | stearoyl-CoA desaturase, putative                                        | SCD (FAE)          | no info     | no info              |        |      |             |                                                 |
| PBANKA_1143400 | NADH-cytochrome b5 reductase, putative                                   | CBR (FAE)          | Dispensable | > 100-fold reduction | -8.90  | 0.92 | reduced     | Figures 6 and S5                                |
| PBANKA_1346500 | protein tyrosine phosphatase-like protein                                | DEH (FAE)          | Dispensable | > 100-fold reduction | -10.34 | 0.65 | reduced     | (Guttery et al., 2014)                          |
| PBANKA_0501700 | phosphomannomutase, putative                                             | PMM (AS)           | Dispensable | 2-100-fold reduction | -2.58  | 0.19 | reduced     | Figures 7 and S6                                |
| PBANKA_0509300 | glutamine--fructose-6-phosphate aminotransferase [isomerizing], putative | GFPT (AS)          | Slow        | not reduced          | -1.41  | 1.32 | no power    | Mosquito stage arrest; not bypassed (Figure 7A) |
| PBANKA_0918200 | phosphoacetylglucosamine mutase, putative                                | PGM3 (AS)          | Slow        | > 100-fold reduction | -7.77  | 0.57 | reduced     | Mosquito stage arrest; not bypassed (Figure 7A) |
| PBANKA_1008800 | glucose-6-phosphate isomerase, putative                                  | GPI (AS)           | Essential   | no info              |        |      |             |                                                 |
| PBANKA_1022300 | mannose-1-phosphate guanyltransferase, putative                          | GMPP (AS)          | Slow        | not reduced          | 3.93   | 0.45 | not reduced |                                                 |
| PBANKA_1122900 | hexokinase, putative                                                     | HK (AS)            | Essential   | no info              |        |      |             |                                                 |
| PBANKA_1127600 | N-acetyltransferase, GNAT family, putative                               | GNPNAT / GNA1 (AS) | no info     | no info              |        |      |             |                                                 |
| PBANKA_1210900 | phosphoglucomutase, putative                                             | PGM (AS)           | Dispensable | 2-100-fold reduction | -2.04  | 0.32 | reduced     |                                                 |
| PBANKA_1212400 | GDP-L-fucose synthase, putative                                          | TSTA (AS)          | Dispensable | not reduced          | 0.08   | 0.18 | not reduced |                                                 |
| PBANKA_1228400 | mannose-6-phosphate isomerase, putative                                  | MPI (AS)           | Slow        | not reduced          | 1.12   | 0.41 | not reduced |                                                 |
| PBANKA_1232300 | UTP--glucose-1-phosphate uridylyltransferase, putative                   | USP (AS)           | Dispensable | not reduced          | 0.37   | 0.73 | not reduced | Figures 7 and S6                                |
| PBANKA_1343800 | transcriptional regulatory protein sir2a                                 | GNPDA (AS)         | Dispensable | not reduced          | 0.54   | 0.47 | no power    |                                                 |
| PBANKA_1356600 | UDP-N-acetylglucosamine pyrophosphorylase, putative                      | UAP (AS)           | Slow        | > 100-fold reduction | -8.11  | 1.36 | reduced     | Figures 7 and S6                                |
| PBANKA_1423700 | GDP-mannose 4,6-dehydratase, putative                                    | GMD5 (AS)          | Dispensable | not reduced          | -0.27  | 0.17 | not reduced |                                                 |
| PBANKA_0715500 | phosphoglucomutase-2                                                     | PGM (AS)           | Slow        | not reduced          | 0.08   | 0.67 | no power    |                                                 |

Note on \*: Having established that the  $\Delta$ KCR knock-out mutant does not show a significant blood stage fitness defect (Figure S5A), the SG-B2 log<sub>2</sub>-fold change value shown here is that prior to blood stage fitness correction and thus not factoring in the “essential” blood stage phenotype determined by Bushell *et al.*, 2017.
