# Supplementary material for: Genome-Scale Identification of Essential Metabolic Processes for Targeting the Plasmodium Liver Stage
Source: PubMed Central journal article supplement (PMC6904910; doi:10.1016/j.cell.2019.10.030), 2019-11-14
Supplement: mmc6.pdf [file mmc6.pdf]

**Table S6: Oligonucleotides used for genotyping of single knock-out mutants, related to Figures 5, 6 and 7.**

| <b>Genotyping for mutants generated with a 3xHA-hdhfr-yFCU gene replacement cassette</b>      |              |           |             |                                        |                                     |                  |
|-----------------------------------------------------------------------------------------------|--------------|-----------|-------------|----------------------------------------|-------------------------------------|------------------|
| Gene ID                                                                                       | PbGEM vector | Gene name | Primer name | Sequence 5'→3'                         | Description                         | Size PCR product |
| PBANKA_0505000                                                                                | PbGEM-085541 | PDH-E2    | 8947        | ATGGTCCCATGCTGCTACA                    | QCR1, Sanger                        | 300 bp           |
|                                                                                               |              |           | 8948        | AAACGCTTCGGGGCTATACT                   | QCR2, Sanger                        |                  |
| PBANKA_0511000                                                                                | PbGEM-015012 | HCS1      | 8360        | GCACGGCACTTGCATTTTCGATG                | 5'F, LUMC                           | 733 bp           |
|                                                                                               |              |           | 8361        | CATCATGTAAATATGCCTTTTAAG               | 3'R, LUMC                           |                  |
| PBANKA_1410500                                                                                | PbGEM-063795 | FabD      | 8362        | GACAAGTGTAAATAATGATGTAG                | 5'F, LUMC                           | 844 bp           |
|                                                                                               |              |           | 8363        | CATTATAAGCACAAACCCTCTAC                | 3'R, LUMC                           |                  |
| PBANKA_0823800                                                                                | PbGEM-342140 | FabG      | 8370        | CATTCTTTATTTTAGGTTAATC                 | 5'F, LUMC                           | 972 bp           |
|                                                                                               |              |           | 8371        | CATTCTCCAGCAGGAATATTCTG                | 3'R, LUMC                           |                  |
| PBANKA_0308200                                                                                | PbGEM-270259 | FabH      | 8366        | CTAGAATACGCGCTGTTGGTGG                 | 5'F, LUMC                           | 656 bp           |
|                                                                                               |              |           | 8367        | CTCCAAATAAAATTTTGAGGCG                 | 3'R, LUMC                           |                  |
| PBANKA_1357500                                                                                | PbGEM-317331 | LipA      | 8368        | GCATATTTGCTCTGCCTTATTC                 | 5'F, LUMC                           | 918 bp           |
|                                                                                               |              |           | 8369        | GGGCATATACATCTAACCAC                   | 3'R, LUMC                           |                  |
| PBANKA_0820900                                                                                | PbGEM-239778 | ELO-A     | 8364        | GGATCCCAGGAAAGGGGAGAG                  | 5'F, LUMC                           | 1 kb             |
|                                                                                               |              |           | 8365        | GTCATGGGCATATGTTGCAAATC                | 3'R, LUMC                           |                  |
| PBANKA_0522400                                                                                | PbGEM-538163 | KCR       | 8576        | AGTCGGTTCATTTCTGTG                     | QCR1, Sanger                        | 484 bp           |
|                                                                                               |              |           | 8577        | ACAGGATGCACGGATGGTATTGGG               | QCR2, Sanger                        |                  |
| PBANKA_1143400                                                                                | PbGEM-342764 | CBR       | 8951        | TCCACTTACCTTTCCACAAACA                 | QCR1, Sanger                        | 523 bp           |
|                                                                                               |              |           | 8952        | CCGACCAGCTGATTATACATGTGC               | QCR2, Sanger                        |                  |
| PBANKA_1232300                                                                                | PbGEM-313053 | USP       | 8745        | TGGAACCCATATATTATGCCACCCA              | QCR1, Sanger                        | 611 bp           |
|                                                                                               |              |           | 8746        | TGAAATGAACGCAGGGATGT                   | QCR2, Sanger                        |                  |
| PBANKA_0501700                                                                                | PbGEM-341900 | PMM       | 8735        | AGGTCCTACTACATCGAACAGA                 | QCR1, Sanger                        | 638 bp           |
|                                                                                               |              |           | 8736        | AAGTGCATTTGGTCAATCCA                   | QCR2, Sanger                        |                  |
| PBANKA_0918200                                                                                | PbGEM-093581 | PGM3      | 8739        | AGTCGAAATCTCCATAGGT                    | QCR1, Sanger                        | 518 bp           |
|                                                                                               |              |           | 8740        | AGTCAACTACAGCTTTTCGAACGT               | QCR2, Sanger                        |                  |
| PBANKA_0509300                                                                                | PbGEM-274634 | GFPT      | 9168        | CAGAGGATATGATTCATGTGGTATG              | 5'F, LUMC                           | 803 bp           |
|                                                                                               |              |           | 9169        | CATCGACGTATGGGTCTAAACCACC              | 3'R, LUMC                           |                  |
| <b>Genotyping for mutants generated with a GOMO-GFP-Cherry-FACS gene replacement cassette</b> |              |           |             |                                        |                                     |                  |
| PBANKA_0501700                                                                                | PbGEM-646744 | PMM       | 1593        | TCCAAAAGAATGTGCCAECTCGT                | GT Sanger Integration PCR with 1431 | 6.5 kb           |
|                                                                                               |              |           | 1591        | AGGTCCCATCTACATCGAA                    | QCR1 Sanger                         |                  |
|                                                                                               |              |           | 1592        | AAGTGCATTTGGTCAATCCA                   | QCR2 Sanger                         |                  |
| PBANKA_1356600                                                                                | PbGEM-646750 | UAP       | 1596        | TGTTGTTCCATCCTCTGTTG                   | GT Sanger Integration PCR with 1752 | 5 kb             |
|                                                                                               |              |           | 1594        | TGAAGTCGTGATCCCAACCC                   | QCR1 Sanger                         |                  |
|                                                                                               |              |           | 1595        | CAGGCGTTCATCATTGACCTAC                 | QCR2 Sanger                         |                  |
| PBANKA_0522400                                                                                | PbGEM-645640 | KCR       | 1578        | ACATGTGCATGTGTATGTGCT                  | GT Sanger Integration PCR with 1431 | 6 kb             |
|                                                                                               |              |           | 1577        | AGCTCGGTTTCCATTTCTGTG                  | QCR1 Sanger                         |                  |
|                                                                                               |              |           | 1576        | ACAGGATGCACGGATGGTATTG                 | QCR2 Sanger                         |                  |
| <b>Integration primers used with GT</b>                                                       |              |           |             |                                        |                                     |                  |
| -                                                                                             | -            | 3'PbDHFR  | 1752        | CACACATAAAATGGCTAGTATGAATA GC          | GW1                                 |                  |
|                                                                                               |              | 3'PbHsp70 | 1431        | CTTTGGTGACAGATACTACTGTGTTT             | GW2                                 |                  |
| <b>Pb gDNA control primers</b>                                                                |              |           |             |                                        |                                     |                  |
| PBANKA_0514900                                                                                | -            | P28       | 1755        | CGGCCATGGATGAATTTAAATACA               |                                     | 200 bp           |
|                                                                                               |              |           | 1271        | TCCCCGCGCCATGGATGAATTTAA ATACAGTTTTATT |                                     |                  |
|                                                                                               |              |           | 1756        | GGACTAGTTGGCTTACATATATTTG TG           |                                     |                  |
