# Supplementary material for: Genome-Scale Identification of Essential Metabolic Processes for Targeting the Plasmodium Liver Stage
Source: PubMed Central journal article supplement (PMC6904910; doi:10.1016/j.cell.2019.10.030), 2019-11-14
Supplement: mmc7.pdf [file mmc7.pdf]

**Table S7: Index primers used for multiplexing of barseq libraries, related to Figures 5, 6 and 7.**

| Oligo name  | Sequence 5'→3'                                                                  | Barcode      |
|-------------|---------------------------------------------------------------------------------|--------------|
| Arg00444    | TCGGCATTCTGCTGAACCGCTCTCCGATCTGTAATTCGTGCGGTAC                                  | -            |
| Arg00445    | ACACTTTTCCCTACACGACGCTCTCCGATCTCTTCAATTCGATGGGTAC                               | -            |
| PE 1.0      | AATGATACGGCGACCACCGAGATCTACACTTTTCCCTACACGACGCTCTCCGATC*T                       | -            |
| iPCRindex1  | CAAGCAGAAGACGGCATAACGAGATTGCTAATCACTGAGATCGGTCTCGGCATTCTGCTGAACCGCTCTCCGATC*T   | AGTGATTAGCA  |
| iPCRindex2  | CAAGCAGAAGACGGCATAACGAGATTAGGGGGATTGAGATCGGTCTCGGCATTCTGCTGAACCGCTCTCCGATC*T    | GAATCCCCCTA  |
| iPCRindex3  | CAAGCAGAAGACGGCATAACGAGATAGTTTCCAGGGAGATCGGTCTCGGCATTCTGCTGAACCGCTCTCCGATC*T    | CCTGGGAAACT  |
| iPCRindex4  | CAAGCAGAAGACGGCATAACGAGATCTGGGAGGTAGAGATCGGTCTCGGCATTCTGCTGAACCGCTCTCCGATC*T    | TACCTCCCAGG  |
| iPCRindex5  | CAAGCAGAAGACGGCATAACGAGATATACCACAAATGAGATCGGTCTCGGCATTCTGCTGAACCGCTCTCCGATC*T   | ATTGTGGTAT   |
| iPCRindex6  | CAAGCAGAAGACGGCATAACGAGATGATCTCTCGGGAGATCGGTCTCGGCATTCTGCTGAACCGCTCTCCGATC*T    | CCCGAGAGATC  |
| iPCRindex7  | CAAGCAGAAGACGGCATAACGAGATACCCTATACTCGAGATCGGTCTCGGCATTCTGCTGAACCGCTCTCCGATC*T   | GAGTATAGGGT  |
| iPCRindex8  | CAAGCAGAAGACGGCATAACGAGATCTCAATTAAGAGAGATCGGTCTCGGCATTCTGCTGAACCGCTCTCCGATC*T   | TCTTAATTGAG  |
| iPCRindex9  | CAAGCAGAAGACGGCATAACGAGATCGACAGAACGTGAGATCGGTCTCGGCATTCTGCTGAACCGCTCTCCGATC*T   | ACGTTCTGTCTG |
| iPCRindex10 | CAAGCAGAAGACGGCATAACGAGATTCGCCATTATGGAGATCGGTCTCGGCATTCTGCTGAACCGCTCTCCGATC*T   | CATAATGGCGA  |
| iPCRindex11 | CAAGCAGAAGACGGCATAACGAGATATGTTCCGGCCGAGATCGGTCTCGGCATTCTGCTGAACCGCTCTCCGATC*T   | GGCCGGAACAT  |
| iPCRindex12 | CAAGCAGAAGACGGCATAACGAGATTCTTGAAGTGAGAGATCGGTCTCGGCATTCTGCTGAACCGCTCTCCGATC*T   | TCACTTCAAGA  |
| iPCRindex13 | CAAGCAGAAGACGGCATAACGAGATGAAGGCCAGCTGAGATCGGTCTCGGCATTCTGCTGAACCGCTCTCCGATC*T   | AGCTGGCCTTC  |
| iPCRindex14 | CAAGCAGAAGACGGCATAACGAGATCCAATGTGCAGGAGATCGGTCTCGGCATTCTGCTGAACCGCTCTCCGATC*T   | CTGCACATTGG  |
| iPCRindex15 | CAAGCAGAAGACGGCATAACGAGATATCGAAGGACCGAGATCGGTCTCGGCATTCTGCTGAACCGCTCTCCGATC*T   | GGTCCTTCGAT  |
| iPCRindex16 | CAAGCAGAAGACGGCATAACGAGATTCGGGTGCGAAGAGATCGGTCTCGGCATTCTGCTGAACCGCTCTCCGATC*T   | TTCGACCCGA   |
| iPCRindex17 | CAAGCAGAAGACGGCATAACGAGATGTAATTTACGGGAGATCGGTCTCGGCATTCTGCTGAACCGCTCTCCGATC*T   | CCGTAAATTAC  |
| iPCRindex18 | CAAGCAGAAGACGGCATAACGAGATATATCGACTACGAGATCGGTCTCGGCATTCTGCTGAACCGCTCTCCGATC*T   | GTAGTCGATAT  |
| iPCRindex19 | CAAGCAGAAGACGGCATAACGAGATTGATTCTTACAGAGATCGGTCTCGGCATTCTGCTGAACCGCTCTCCGATC*T   | TGTAAGAATCA  |
| iPCRindex20 | CAAGCAGAAGACGGCATAACGAGATACGGCGGGCCTGAGATCGGTCTCGGCATTCTGCTGAACCGCTCTCCGATC*T   | AGGCCCGCCGT  |
| iPCRindex21 | CAAGCAGAAGACGGCATAACGAGATCTTGCCTGGAGGAGATCGGTCTCGGCATTCTGCTGAACCGCTCTCCGATC*T   | CTCCACGCAAG  |
| iPCRindex22 | CAAGCAGAAGACGGCATAACGAGATTAATCAAAGACGAGATCGGTCTCGGCATTCTGCTGAACCGCTCTCCGATC*T   | GTCTTTGATTA  |
| iPCRindex23 | CAAGCAGAAGACGGCATAACGAGATGGCGGGCTTAGAGATCGGTCTCGGCATTCTGCTGAACCGCTCTCCGATC*T    | TAGAGCCCGCC  |
| iPCRindex24 | CAAGCAGAAGACGGCATAACGAGATCTCCATTTCTGAGATCGGTCTCGGCATTCTGCTGAACCGCTCTCCGATC*T    | AGAAATGGAGG  |
| iPCRindex25 | CAAGCAGAAGACGGCATAACGAGATAACGAGCGCTGGAGATCGGTCTCGGCATTCTGCTGAACCGCTCTCCGATC*T   | CAGCGCTGGTT  |
| iPCRindex26 | CAAGCAGAAGACGGCATAACGAGATTATTCGTCAACGAGATCGGTCTCGGCATTCTGCTGAACCGCTCTCCGATC*T   | GTTGACGAATA  |
| iPCRindex27 | CAAGCAGAAGACGGCATAACGAGATGCGCTGATGCAGAGATCGGTCTCGGCATTCTGCTGAACCGCTCTCCGATC*T   | TGCATCAGCGC  |
| iPCRindex28 | CAAGCAGAAGACGGCATAACGAGATCTCATATGGCTGAGATCGGTCTCGGCATTCTGCTGAACCGCTCTCCGATC*T   | AGCCATATGAG  |
| iPCRindex29 | CAAGCAGAAGACGGCATAACGAGATACAGGGGAGGAGATCGGTCTCGGCATTCTGCTGAACCGCTCTCCGATC*<br>T | CCTGCCCTGT   |
| iPCRindex30 | CAAGCAGAAGACGGCATAACGAGATGGTTTTATACGAGATCGGTCTCGGCATTCTGCTGAACCGCTCTCCGATC*T    | GGTATAAAACC  |
| iPCRindex31 | CAAGCAGAAGACGGCATAACGAGATGCATGACTTTAGAGATCGGTCTCGGCATTCTGCTGAACCGCTCTCCGATC*T   | TAAAGTCATGC  |
| iPCRindex32 | CAAGCAGAAGACGGCATAACGAGATTTCTGAGTTCTGAGATCGGTCTCGGCATTCTGCTGAACCGCTCTCCGATC*T   | AGAACTCAGAA  |
| iPCRindex33 | CAAGCAGAAGACGGCATAACGAGATGATTAAGCTGGAGATCGGTCTCGGCATTCTGCTGAACCGCTCTCCGATC*T    | CAGCTTAATCG  |
| iPCRindex34 | CAAGCAGAAGACGGCATAACGAGATTCTTAAGCCGAGATCGGTCTCGGCATTCTGCTGAACCGCTCTCCGATC*T     | GGCTTAAGAGA  |

|             |                                                                               |                  |
|-------------|-------------------------------------------------------------------------------|------------------|
| iPCRindex35 | CAAGCAGAAGACGGCATAACGAGATCCGACAGGTGAGAGATCGGTCTCGGCATTCTGCTGAACCGCTCTCCGATC*T | TCACCTGTCGG      |
| iPCRindex36 | CAAGCAGAAGACGGCATAACGAGATAGTATCACTATGAGATCGGTCTCGGCATTCTGCTGAACCGCTCTCCGATC*T | ATAGTGATACT      |
| iPCRindex37 | CAAGCAGAAGACGGCATAACGAGATGTTGCTGATGGAGATCGGTCTCGGCATTCTGCTGAACCGCTCTCCGATC*T  | CATCAGCGAAC      |
| iPCRindex38 | CAAGCAGAAGACGGCATAACGAGATCCCATGGCGGAGATCGGTCTCGGCATTCTGCTGAACCGCTCTCCGATC*T   | GCGCCATGGGA      |
| iPCRindex39 | CAAGCAGAAGACGGCATAACGAGATGGAGTTCAACAGAGATCGGTCTCGGCATTCTGCTGAACCGCTCTCCGATC*T | TGTTGAACTCC      |
| iPCRindex40 | CAAGCAGAAGACGGCATAACGAGATACTGCGTATATGAGATCGGTCTCGGCATTCTGCTGAACCGCTCTCCGATC*T | ATATACGCAGT      |
| iPCRindex41 | CAAGCAGAAGACGGCATAACGAGATTACGTCGTGCGGAGATCGGTCTCGGCATTCTGCTGAACCGCTCTCCGATC*T | CGCACGACGTA      |
| iPCRindex42 | CAAGCAGAAGACGGCATAACGAGATCCTTCTGTCCCGAGATCGGTCTCGGCATTCTGCTGAACCGCTCTCCGATC*T | GGGACAGAAAG<br>G |
| iPCRindex43 | CAAGCAGAAGACGGCATAACGAGATATACTTGTAAAGAGATCGGTCTCGGCATTCTGCTGAACCGCTCTCCGATC*T | TTAAACAAGTAT     |
| iPCRindex44 | CAAGCAGAAGACGGCATAACGAGATTACCCAGGAGTGAGATCGGTCTCGGCATTCTGCTGAACCGCTCTCCGATC*T | ACTCCTGGGTA      |
| iPCRindex45 | CAAGCAGAAGACGGCATAACGAGATGGGGTTTTCTGGAGATCGGTCTCGGCATTCTGCTGAACCGCTCTCCGATC*T | CAGAAAAACCC      |
| iPCRindex46 | CAAGCAGAAGACGGCATAACGAGATACTGCTGCGGAGATCGGTCTCGGCATTCTGCTGAACCGCTCTCCGATC*T   | GCACGAGCAGT      |
| iPCRindex47 | CAAGCAGAAGACGGCATAACGAGATGAAGCATAATAGAGATCGGTCTCGGCATTCTGCTGAACCGCTCTCCGATC*T | TATTATGCTTC      |
| iPCRindex48 | CAAGCAGAAGACGGCATAACGAGATATACAGTCGCTGAGATCGGTCTCGGCATTCTGCTGAACCGCTCTCCGATC*T | AGCGACTGTAT      |
| iPCRindex49 | CAAGCAGAAGACGGCATAACGAGATCTGTCGCAAGGGAGATCGGTCTCGGCATTCTGCTGAACCGCTCTCCGATC*T | CCTTGCACAG       |
| iPCRindex50 | CAAGCAGAAGACGGCATAACGAGATTGCAATCTAACGAGATCGGTCTCGGCATTCTGCTGAACCGCTCTCCGATC*T | GTTAGATTGCA      |
| iPCRindex51 | CAAGCAGAAGACGGCATAACGAGATGATGGTATTTAGAGATCGGTCTCGGCATTCTGCTGAACCGCTCTCCGATC*T | TAAATACCATC      |
| iPCRindex52 | CAAGCAGAAGACGGCATAACGAGATCAAAAAATAGAGATCGGTCTCGGCATTCTGCTGAACCGCTCTCCGATC*T   | ATATTTTTAG       |
| iPCRindex53 | CAAGCAGAAGACGGCATAACGAGATAGCGTTTAGGGGAGATCGGTCTCGGCATTCTGCTGAACCGCTCTCCGATC*T | CCCTAAACGCT      |
| iPCRindex54 | CAAGCAGAAGACGGCATAACGAGATCCTAACCAATCGAGATCGGTCTCGGCATTCTGCTGAACCGCTCTCCGATC*T | GATTGTTAGGA      |
| iPCRindex55 | CAAGCAGAAGACGGCATAACGAGATGAGACTCGGTAGAGATCGGTCTCGGCATTCTGCTGAACCGCTCTCCGATC*T | TACCGAGTCTC      |
| iPCRindex56 | CAAGCAGAAGACGGCATAACGAGATCAATTTGTTCTGAGATCGGTCTCGGCATTCTGCTGAACCGCTCTCCGATC*T | AGAACAAATTG      |
| iPCRindex57 | CAAGCAGAAGACGGCATAACGAGATATGAGATCAAGGAGATCGGTCTCGGCATTCTGCTGAACCGCTCTCCGATC*T | CTTGATCTCAT      |
| iPCRindex58 | CAAGCAGAAGACGGCATAACGAGATTAACGCGTGGCGAGATCGGTCTCGGCATTCTGCTGAACCGCTCTCCGATC*T | GCCACGCGTTA      |
| iPCRindex59 | CAAGCAGAAGACGGCATAACGAGATCCGTATCTATAGAGATCGGTCTCGGCATTCTGCTGAACCGCTCTCCGATC*T | TATAGATACGG      |
| iPCRindex60 | CAAGCAGAAGACGGCATAACGAGATTGGCTGGGTATGAGATCGGTCTCGGCATTCTGCTGAACCGCTCTCCGATC*T | ATACCCAGCCA      |
| iPCRindex61 | CAAGCAGAAGACGGCATAACGAGATGTACATCCGGGGAGATCGGTCTCGGCATTCTGCTGAACCGCTCTCCGATC*T | CCCGGATGTAC      |
| iPCRindex62 | CAAGCAGAAGACGGCATAACGAGATAAGCCGAGATCGAGATCGGTCTCGGCATTCTGCTGAACCGCTCTCCGATC*T | GATCTCGGCTT      |
| iPCRindex63 | CAAGCAGAAGACGGCATAACGAGATCAAAGCGGCTAGAGATCGGTCTCGGCATTCTGCTGAACCGCTCTCCGATC*T | TAGCCGCTTTG      |
| iPCRindex64 | CAAGCAGAAGACGGCATAACGAGATGCTGTATTTAGGAGATCGGTCTCGGCATTCTGCTGAACCGCTCTCCGATC*T | CTAAATACAGC      |
